# Supplementary material for: Development of an Induced Pluripotent Stem Cell-Based Liver-on-a-Chip Assessed with an Alzheimer’s Disease Drug
Source: PubMed Central journal article supplement (PMC10336847; doi:10.1021/acsbiomaterials.3c00346), 2023-06-15
Supplement: ab3c00346_si_001.pdf [file ab3c00346_si_001.pdf]

# Supplementary material

## Development of an induced pluripotent stem cells-based liver-on-a-chip assessed with an Alzheimer's disease drug.

F. Fanizza<sup>1</sup>, L. Boeri<sup>1</sup>, F. Donnalaja<sup>1</sup>, S. Perottoni<sup>1</sup>, G. Forloni<sup>2</sup>, C. Giordano<sup>1\*</sup>, D. Albani<sup>2</sup>

1. Department of Chemistry, Materials and Chemical Engineering 'Giulio Natta', Politecnico di Milano, Milan, Italy.

2. Department of Neuroscience, Istituto di Ricerche Farmacologiche Mario Negri IRCCS, Milan, Italy.

\* Corresponding author

Carmen Giordano

[carmen.giordano@polimi.it](mailto:carmen.giordano@polimi.it)

### SUPPLEMENTARY TABLES

**Table S1 Numerical values of the parameters used for the simulations.**

| Property                                      | Value                                     |
|-----------------------------------------------|-------------------------------------------|
| Atmospheric pressure (outlet)                 | 0 Pa                                      |
| Wall conditions                               | No slip conditions                        |
| Density of culture medium (at 37°C)           | 1000 kg/m <sup>3</sup> <sup>42</sup>      |
| Dynamic viscosity of culture medium (at 37°C) | 8.1*10 <sup>-4</sup> Pa*s <sup>42</sup>   |
| Diffusion coefficient of oxygen               | 1.85*10 <sup>-10</sup> cm <sup>2</sup> /s |
| Pump flow rate                                | 30 µl/min                                 |

|                                                        |                                                   |
|--------------------------------------------------------|---------------------------------------------------|
| Inlet velocity in the upper chamber                    | 0.001 m/s                                         |
| Inlet velocity in the lower chamber                    | $0.19 \cdot 10^{-3}$ m/s                          |
| Membrane permeability                                  | $7.8 \cdot 10^{-19}$ m <sup>2</sup>               |
| Membrane porosity                                      | $2.5 \cdot 10^{-3}$                               |
| Oxygen concentration at the inlets                     | 0.2 mol/m <sup>3</sup>                            |
| Density of COLL-PEG2000 hydrogel (at 37°C)             | 1000 kg/m <sup>3</sup>                            |
| Dynamic viscosity of COLL-PEG2000 hydrogel (at 37°C)   | $8.1 \cdot 10^{-4}$ Pa*s                          |
| COLL-PEG2000 hydrogel permeability                     | $6.45 \cdot 10^{-17}$ m <sup>2</sup>              |
| COLL-PEG2000 hydrogel porosity                         | 0.93                                              |
| iPSC-derived hepatocytes oxygen consumption rate       | 4.5 nmol/(min*10 <sup>6</sup> cell) <sup>20</sup> |
| iPSC-derived endothelial cells oxygen consumption rate | 1.5 pmol/min/1000 cells <sup>21</sup>             |

**Table S2 Numerical values of the parameters used for the donepezil distribution simulations.**

| Property                                                | Value                                      |
|---------------------------------------------------------|--------------------------------------------|
| COLL-PEG2000 hydrogel permeability to donepezil         | $6.45 \cdot 10^{-17}$ m <sup>2</sup>       |
| Donepezil diffusion coefficient in iEndo culture medium | $4,16 \times 10^{-11}$ m <sup>2</sup> /s   |
| Donepezil diffusion coefficient in iHep culture medium  | $4,12 \cdot 10^{-11}$ m <sup>2</sup> /s    |
| Donepezil diffusion coefficient through the hydrogel    | $7,2772 \times 10^{-12}$ m <sup>2</sup> /s |

|                                      |                        |
|--------------------------------------|------------------------|
| Donepezil concentration at the inlet | 0.2 mol/m <sup>3</sup> |
| Donepezil partition coefficient      | 1.07                   |

**SUPPLEMENTARY EXPERIMENTAL**

**Transepithelial electrical resistance assessment**

Transepithelial electrical resistance (TEER) was measured using EVOM (World Precision Instruments, USA) coupled with a chopstick-like electrode. Cell layer resistance was calculated placing the shorter electrode in the apical compartment of the Transwell®-like inserts and the longer one in contact with the plate. TEER ( $\Omega \cdot \text{cm}^2$ ) was calculated as follows:

$$TEER = (R_{measured} - R_{blank}) \cdot MembraneArea$$

Where  $R_{blank}$  was measured on Transwell®-like inserts without cells and the  $MembraneArea$  was 1.13 cm<sup>2</sup>. For each sample, we averaged three measures.

**SUPPLEMENTARY FIGURES**

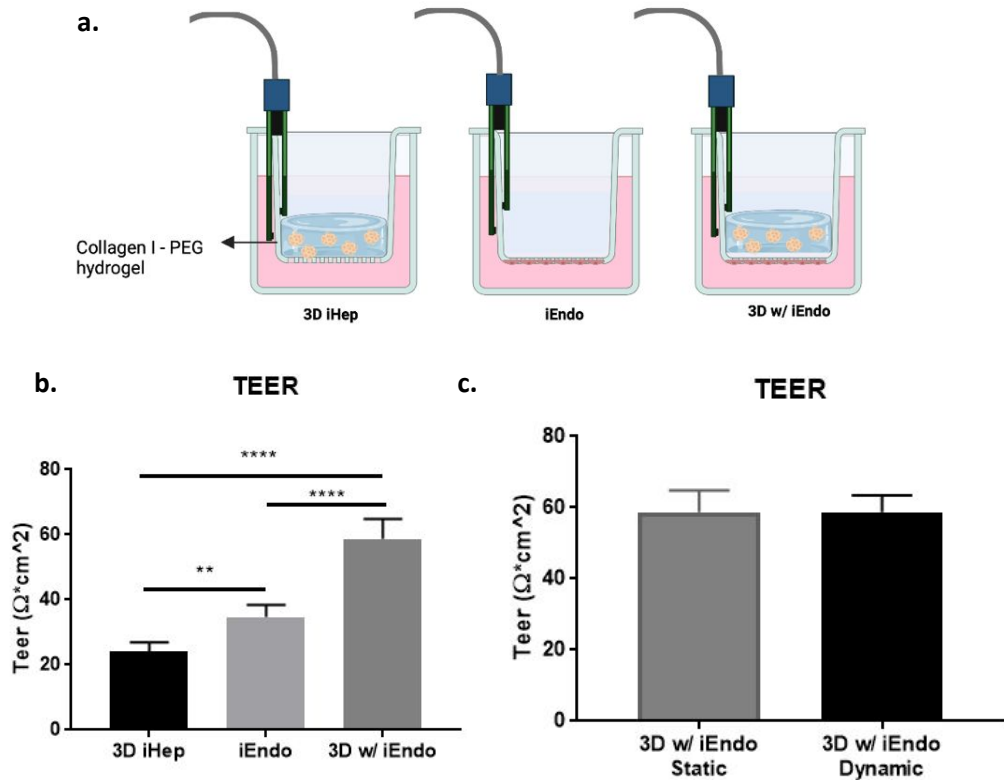

**Figure S1.** a) The schematic shows the cell models assessed with the TEER test into the Transwell®-like insert. b) For each model we measure TEER in static condition. One-way ANOVA, Tukey's multiple comparison post hoc test \*\*= $p < 0.01$ ; \*\*\*\*= $p < 0.0001$ . c) TEER values of the 3D w/ iEndo model in static and dynamic condition. t-test  $p > 0.5$ .
